# Supplementary material for: MnO2 nanoflowers and polyaniline nanoribbons grown on hybrid graphene/Ni 3D scaffolds by in situ electrochemical techniques for high-performance asymmetric supercapacitors
Source: Royal Society of Chemistry journal article supplement (doi:10.1039/c6ta10757e), 2017-01-01
Supplement: c6ta10757e1.pdf [file c6ta10757e1.pdf]

## Supplementary Information

### MnO<sub>2</sub> Nanoflowers and Polyaniline Nanoribbons Grown on Hybrid Graphene/Ni 3D Scaffold by *In-situ* Electrochemical Technique for High- performance Asymmetric Supercapacitors

Liqiong Wu,<sup>a</sup> Lihua Hao,<sup>a</sup> Bowen Pang,<sup>b</sup> Guofeng Wang,<sup>a</sup> Yin Zhang,<sup>a</sup> and  
Xinheng Li<sup>a,\*</sup>

<sup>a</sup> State Key Laboratory for Oxo Synthesis and Selective Oxidation, Suzhou Research  
Institute of LICP, Lanzhou Institute of Chemical Physics (LICP), Chinese  
Academy of Sciences, Suzhou 215123, P. R. China.

<sup>b</sup> College of Chemistry and Chemical Engineering, Xinxiang University, 453003,  
China

E-mail: [xinhengli@licp.cas.cn](mailto:xinhengli@licp.cas.cn)

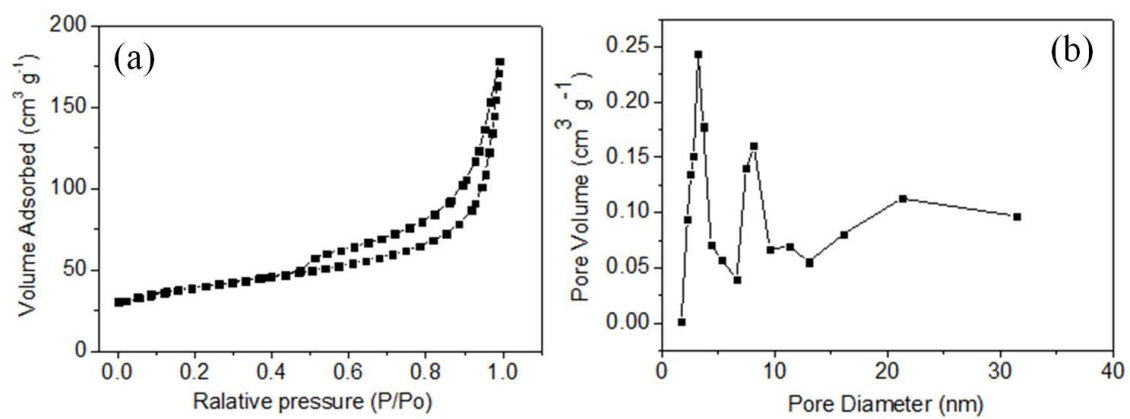

**Figure S1.** Nitrogen adsorption-desorption isotherm (a) and pore size distribution (b) of the as-prepared GF.

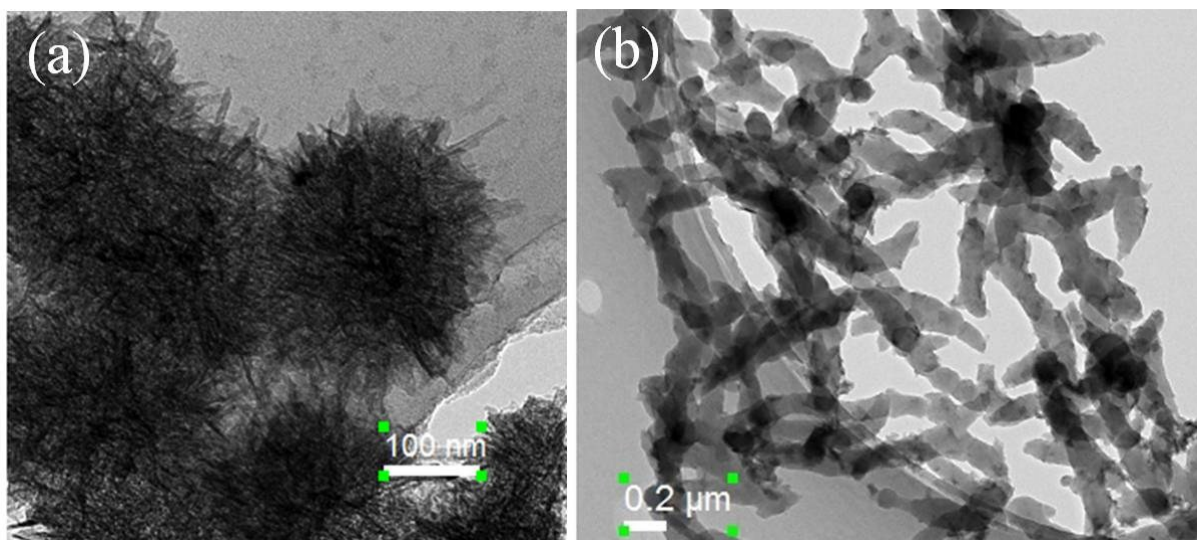

**Figure S2.** TEM images of MnO<sub>2</sub> (a) and PANI (b) peeled off from Ni foam.

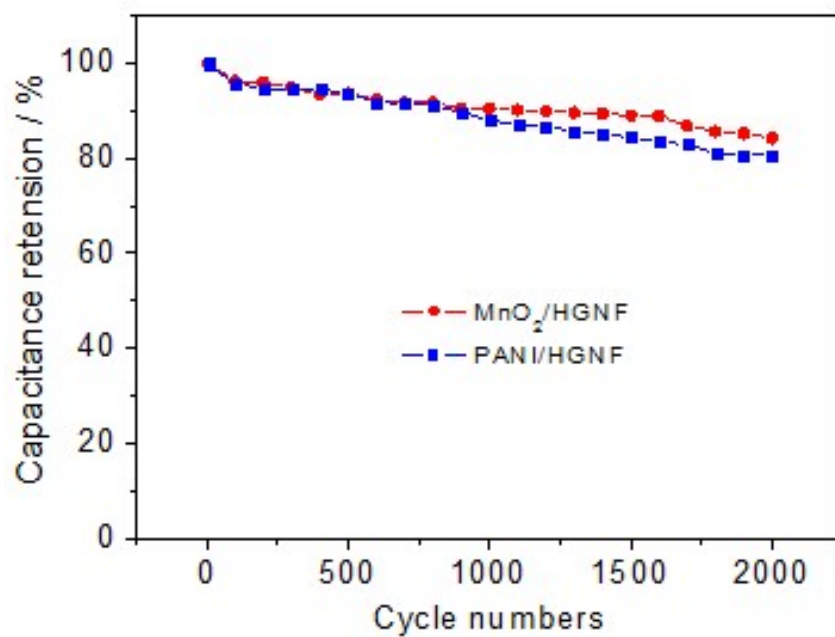

**Figure S3.** Cycling behaviour of the obtained MnO<sub>2</sub>/HGNF and PANI/HGNF electrodes in 1 M Na<sub>2</sub>SO<sub>4</sub> solution at a current density of 2 A g<sup>-1</sup>.

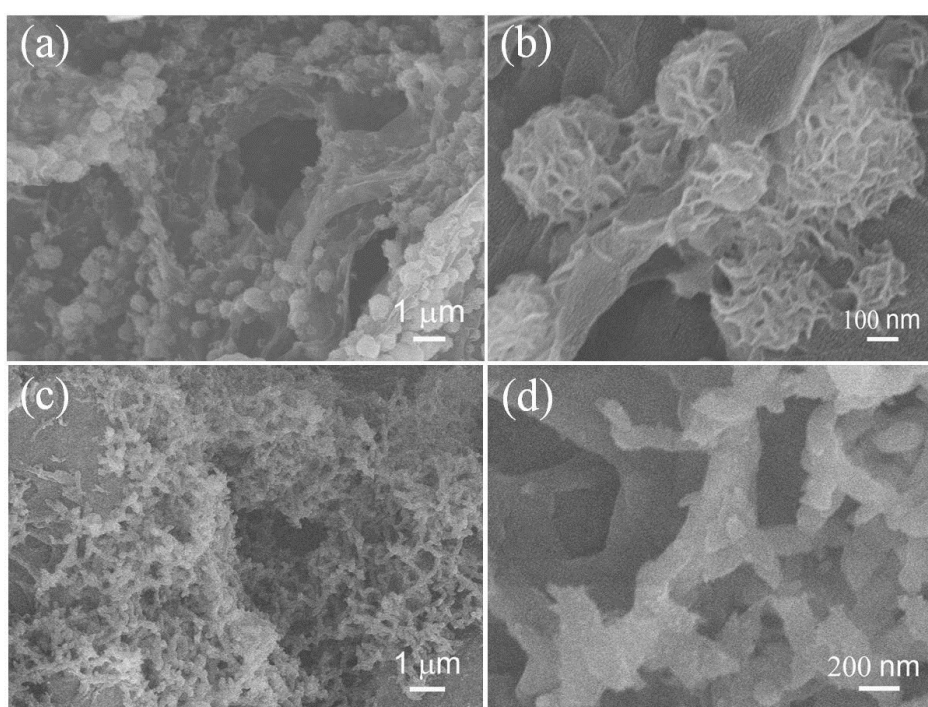

**Figure S4.** SEM images of MnO<sub>2</sub>/HGNF (a,b) and PANI/HGNF (c,d) electrodes in ASC-1 after 2000 cycles at a current density of 2 A g<sup>-1</sup>.

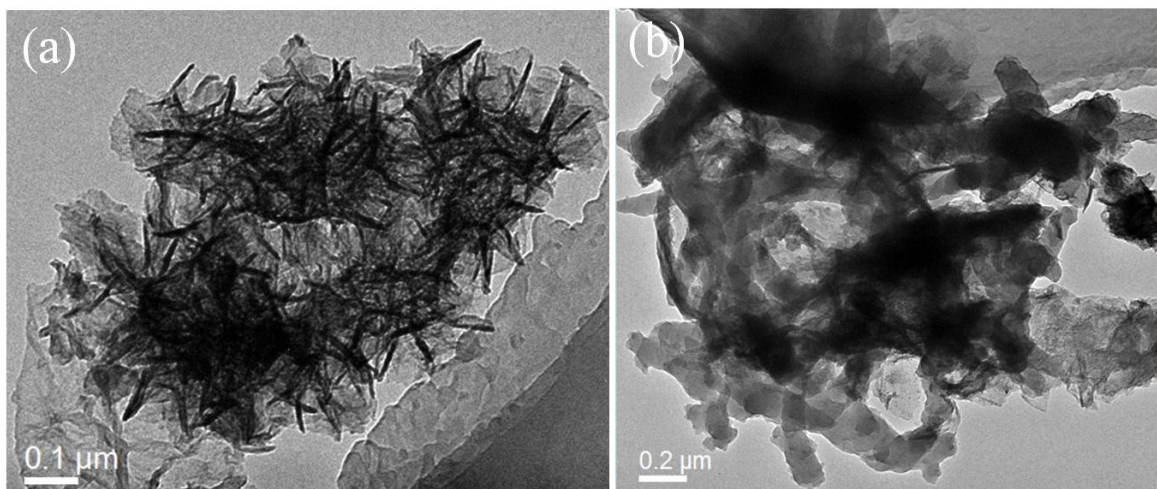

**Figure S5.** TEM images of MnO<sub>2</sub>/HGNF (a,b,) and PANI/HGNF (c,d) in ASC-1 after 2000 cycles at a current density of 2 A g<sup>-1</sup>.
